# Supplementary material for: Transferring genomics to the clinic: distinguishing Burkitt and diffuse large B cell lymphomas
Source: PubMed Central journal article supplement (PMC4512160; doi:10.1186/s13073-015-0187-6), 2015-07-01

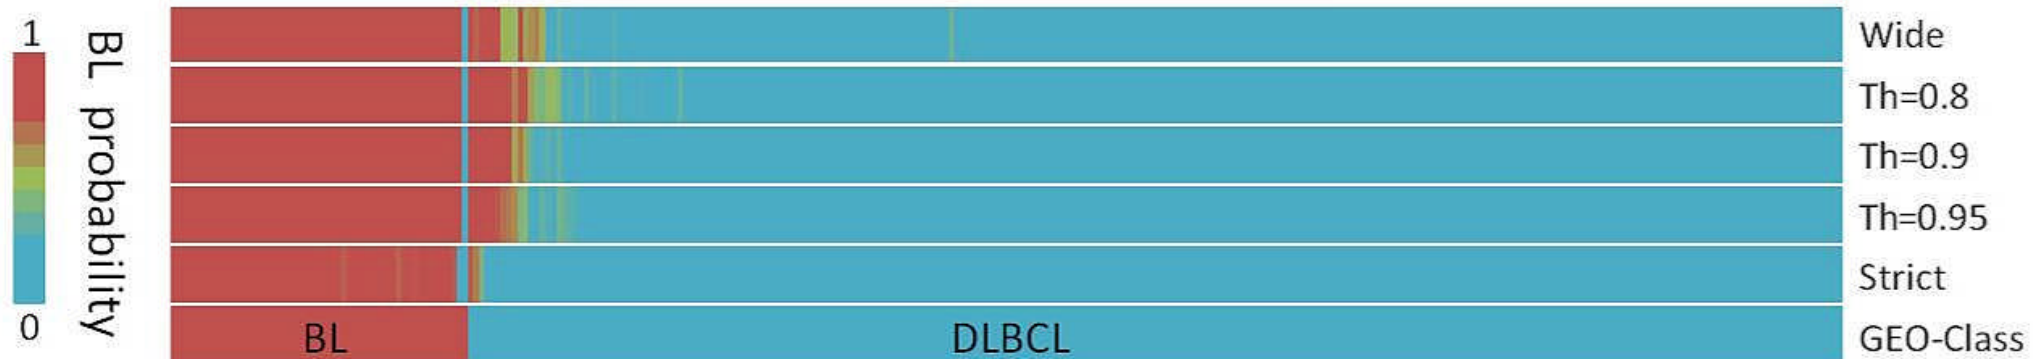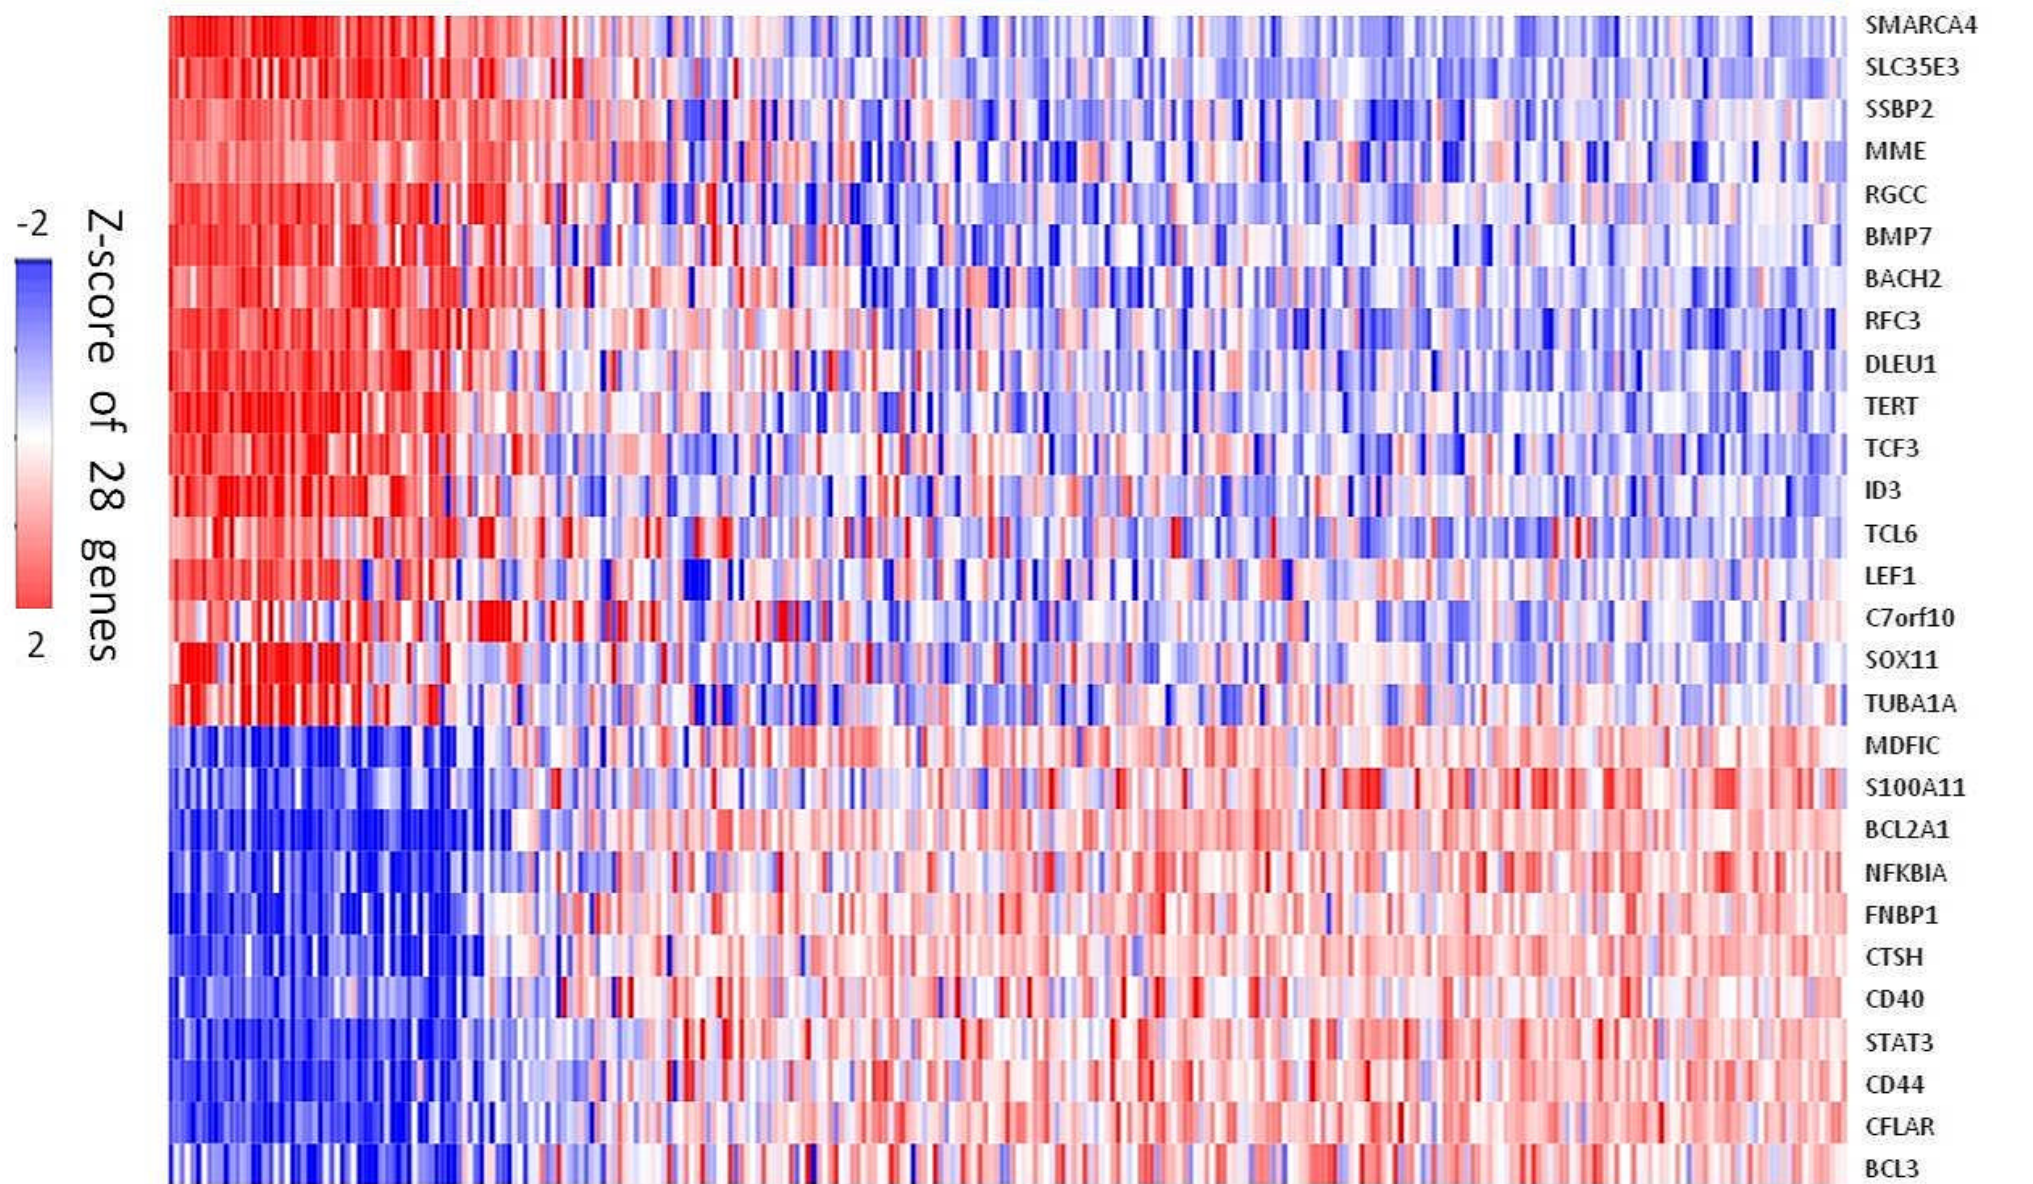

Supplement: 13073_2015_187_MOESM4_ESM.pdf [file 13073_2015_187_MOESM4_ESM.pdf]
